# Supplementary material
Source: MDPI journal article supplement (https://www.mdpi.com/2071-1050/16/5/1978)

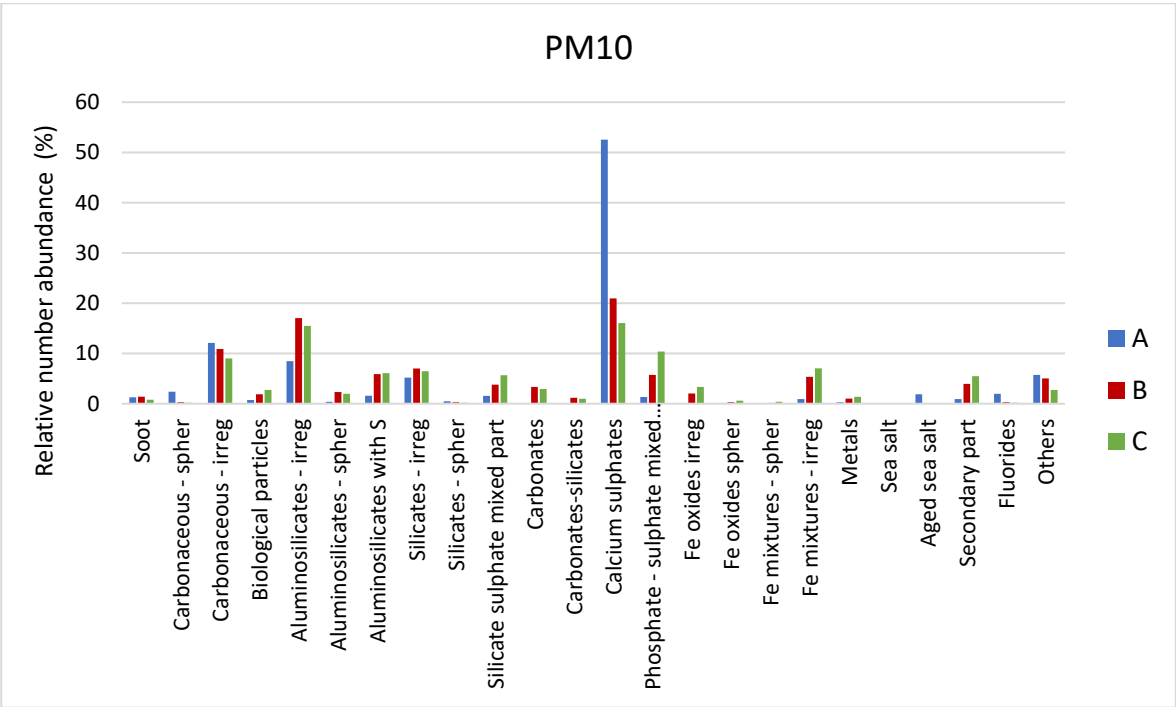

**Figure S1.** Relative number abundance of PM10 at the three sites (A, B and C)

Supplement: s1 [file s1]
